# Supplementary material
Source: HighWire-hosted journal article supplement (https://bmjopen.bmj.com/content/11/8/e048984)
Supplement: inline-supplementary-material-2 [file inline-supplementary-material-2.pdf]

## Annex-2

## Assessing Tertiary Care Hospital's (AKU's) Readiness to Cope with COVID-19 and Future Preparedness to Manage Emergencies in Karachi, Pakistan

## In-Depth Interview Guide

**Basic Information**

| S.no | Name<br>(Confidential) | Age | Sex | Designation | Institution | Years of<br>experiences | Specialty/Ward |
|------|------------------------|-----|-----|-------------|-------------|-------------------------|----------------|
| 1    |                        |     |     |             |             |                         |                |
| 2    |                        |     |     |             |             |                         |                |
| 3    |                        |     |     |             |             |                         |                |

**Knowledge, attitude and practice**

- How do you feel about your level of knowledge regarding COVID-19?  
Probes: Spread of COVID-19, management, prevention
- What are your perceptions about managing COVID cases at AKUH?  
Probes: Facilities for screening, testing, patient isolation, treatment and patient and family education
- Do you have concerns with the prospect of managing/treating cases at AKUH?  
Probes: inadequate screening facilities, less testing kits, inadequate capacity of healthcare providers to manage COVID-19 cases, lack of isolation wards
- What are your views on the safety measures currently in place at AKUH?
- Are you using PPE while caring for COVID-19 cases, as guided during the trainings?

**Perceptions on Hospital Emergency Plan for COVID-19**

- What are your perceptions about AKUH emergency plan for dealing with COVID-19 pandemic?  
Probe: Were you briefed on the emergency plan for COVID-19 - by whom, when, any refreshers given?
- Do you feel a sense of safety in the hospital's emergency plan, which are currently in place?  
Probe: for your safety, healthcare providers' safety, family members' safety

**Training and Drills**

- Were you provided with sufficient trainings and drills for dealing with this emergency?  
Probes: satisfaction with training (content, duration, etc.),
- What aspects were covered in the training?

Probes: medical treatment procedures, personal protective measures, information system management, disinfection and sterilization and principles of quarantine and isolation

### **Perceptions on Hospital Capacity**

1. How do you feel about the AKUH capacity to deal with COVID-19 patients?  
Probes: access to required equipment/ resources
2. What are some of the barriers that hospital staff face while caring for COVID-19 cases?
3. How these barriers could be handled efficiently, in spite of limited resources at AKUH?
4. Do you think your service domain/ specialty is prepared to manage COVID-19 affected patients?  
Probes: if yes how, if no why?
5. In your opinion, what precautions should be acquired for carrying out a routine procedure such as in ER surgeries, intubation, delivery care, C-section planned or otherwise
6. At AKUH, what are the facilitators, that provided support to deal with COVID-19 situation?  
Probes: Trainings, drills, PPEs availability, management support, etc.

### **Information sharing for crisis communication**

1. What are your thoughts on the hospitals system of information sharing for crisis communication?  
Probes: Are you getting the information that you need?
2. Do you feel like you are able to talk about your concerns?  
Probes: through hotline for employees

### **Stress & coping**

1. How do you feel about working under tremendous pressure with COVID -19 situation?  
Probes: working at odd hours, weekends in addition to routine responsibilities, wearing PPEs for long periods
2. What kind of relief you look for yourself to manage with these pressures?  
Probes: compensation/overtime, sufficient PPEs, adequate rest periods, etc.
3. Can you share some of your apprehensions while dealing with COVID -19 suspected or positive patient's?  
Probes: Family members/ colleagues getting infected?
4. How do you cope with anxiety and fear related to managing COVID-19 inpatients?  
Probes: Coping strategies
5. Do you have suggestions on how institution could provide support services for coping with stress related to this crisis situations?

### **Future Preparedness**

1. In your opinion, what are the needs for future preparedness for any outbreak or natural disaster for AKUH?  
Probes: staff trainings, special wards, equipment, protective gears, emergency drills, etc.
